# Supplementary material for: Dihydropyridine-based fluorescence probe for nitric oxide
Source: Royal Society of Chemistry journal article supplement (doi:10.1039/c6ra16713f), 2016-01-01
Supplement: c6ra16713f1.pdf [file c6ra16713f1.pdf]

## Supplementary Information for

### Dihydropyridine-Based Fluorescence Probe for Nitric Oxide

Su-Fang Ma,<sup>a,b</sup> Qiu-Hua Wang<sup>b</sup>, Fu-Tao Liu,<sup>b</sup> Hui-Li Wang,<sup>a</sup> De-Cai Fang,<sup>b</sup> Bing Gong,<sup>b,c</sup> Lan He,<sup>a,b,\*</sup>  
Zhong-Lin Lu,<sup>b\*</sup>

<sup>a</sup> National Institutes for Food and Drug Control, Beijing 100050, China

<sup>b</sup> College of Chemistry, Beijing Normal University, Beijing 100875, China

<sup>c</sup> Department of Chemistry, University at Buffalo, the State University of New York,  
Buffalo, NY 14260, USA.

#### 1. Materials and methods

The nitric oxide (NO) stock solution in de-ionized water was prepared by bubbling NO into deoxygenated de-ionized water for 15 min.<sup>1</sup> Singlet oxygen (<sup>1</sup>O<sub>2</sub>) was generated from ClO<sup>•</sup> and H<sub>2</sub>O<sub>2</sub>. Peroxynitrite was generated from amyl nitrite and H<sub>2</sub>O<sub>2</sub> following literature procedures.<sup>2</sup> Superoxide radical anion (O<sub>2</sub><sup>•-</sup>) was from KO<sub>2</sub>.

1 J. Ouyang, H. Hong, C. Shen, Y. Zhao, C. G. Ouyang, L. Dong, J. H. Zhu, Z. J. Guo, K. Zeng, J. N. Chen, C. Y. Zhang and J. F. Zhang, *Free Radic. Biol. Med.* 2008, **45**, 1426-1436.

2 R. M. Uppu, and W. A. Pryor, *Anal. Biochem.* 1996, **236**, 242–249.

## 2. Appendix

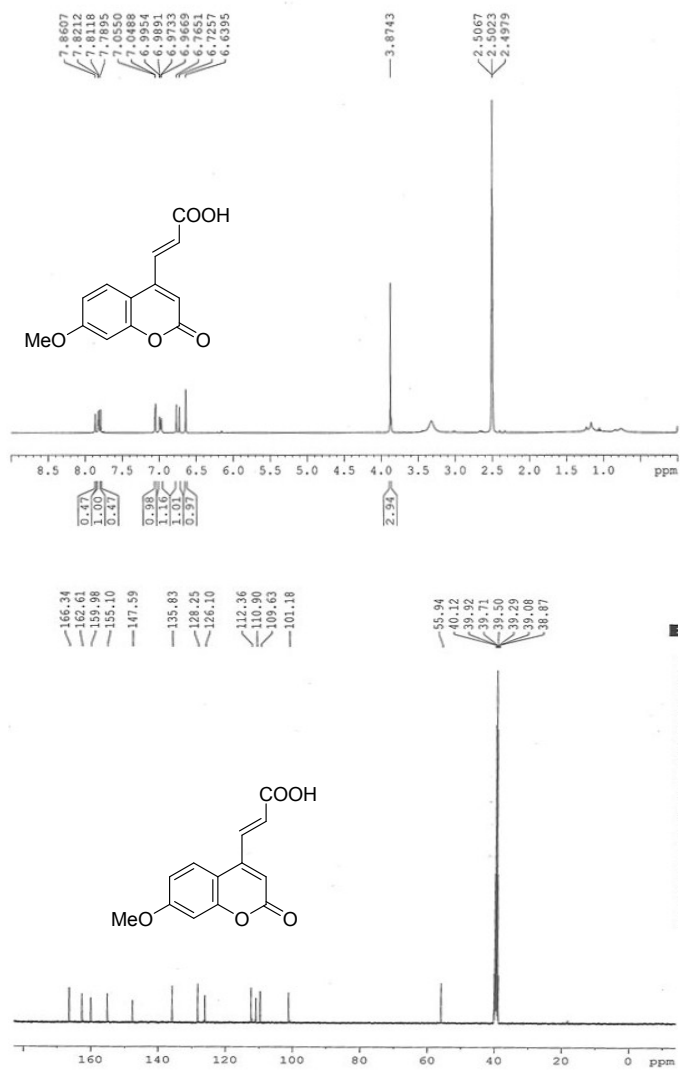

Fig. S1.  $^1\text{H}$  NMR (DMSO- $d_6$ ) and  $^{13}\text{C}$  NMR (DMSO- $d_6$ ) of compound 1a

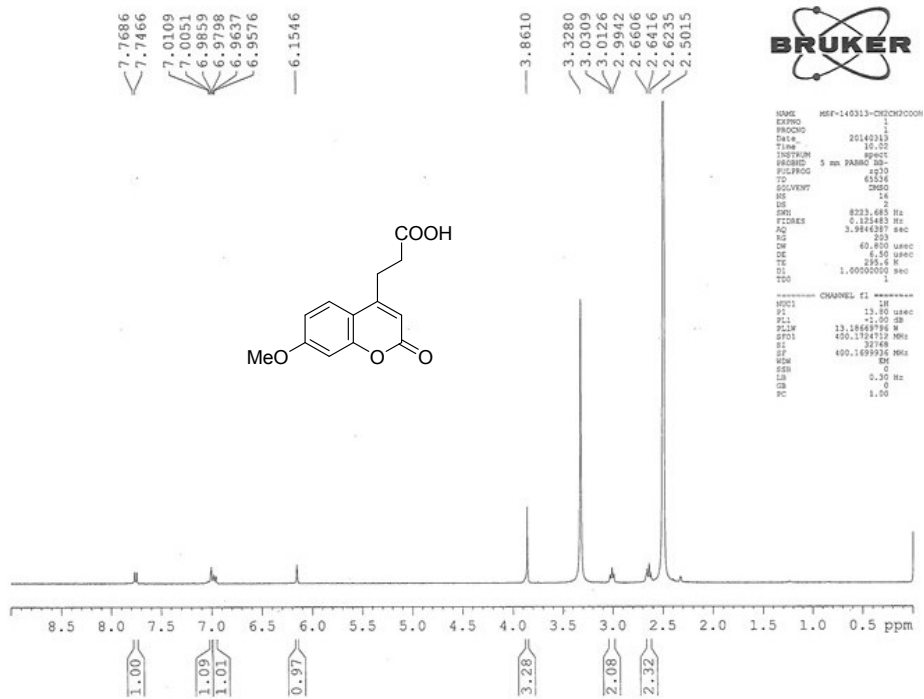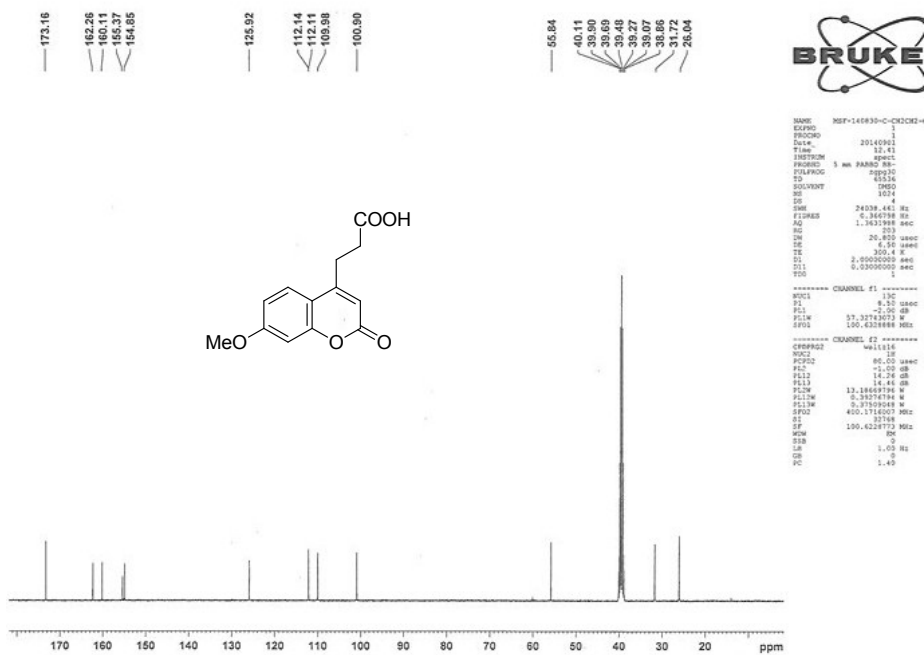

Fig. S2. <sup>1</sup>H NMR (DMSO-*d*<sub>6</sub>) and <sup>13</sup>C NMR (DMSO-*d*<sub>6</sub>) of compound 1b

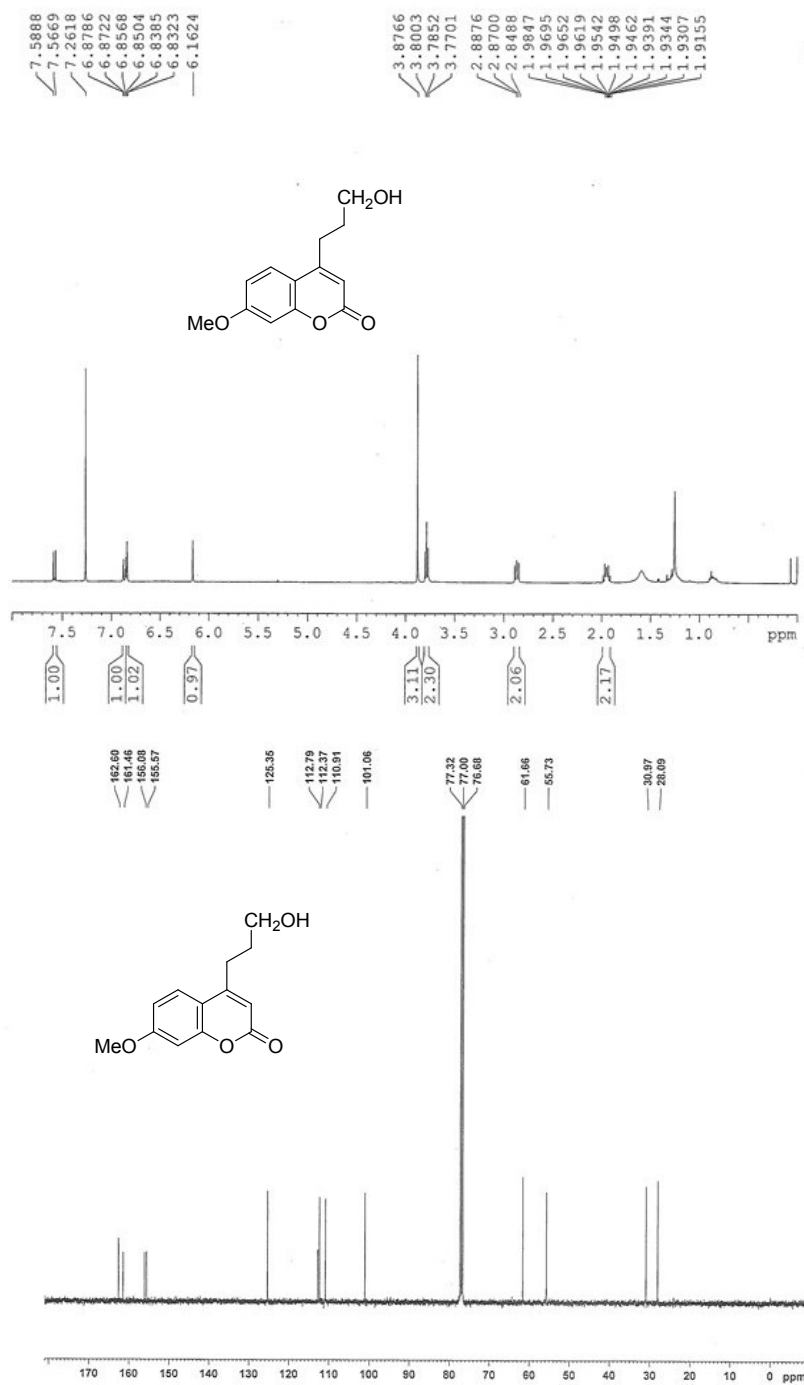

**Fig. S3.** <sup>1</sup>H NMR (CDCl<sub>3</sub>) and <sup>13</sup>C NMR (CDCl<sub>3</sub>) of compound **1c**

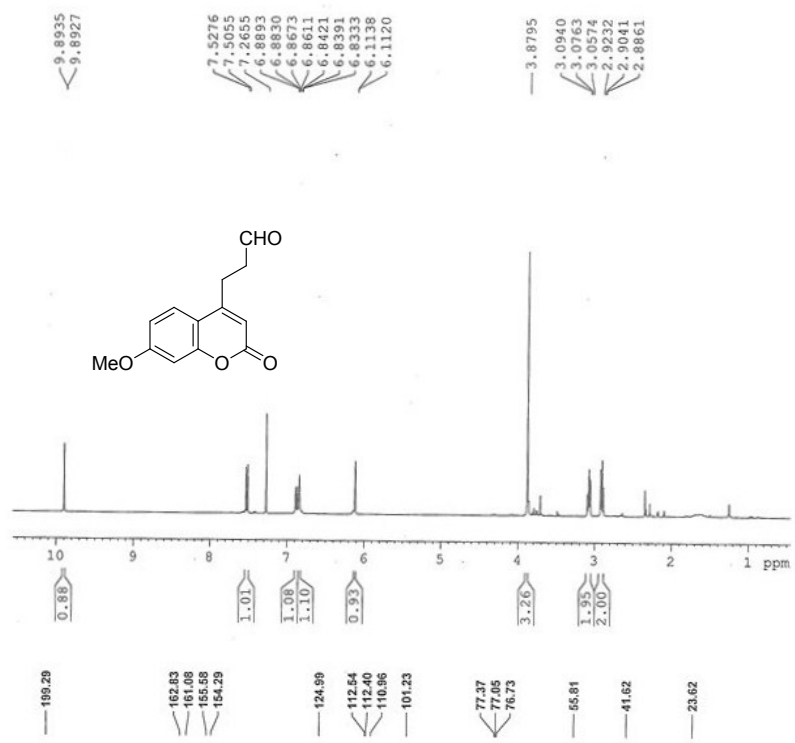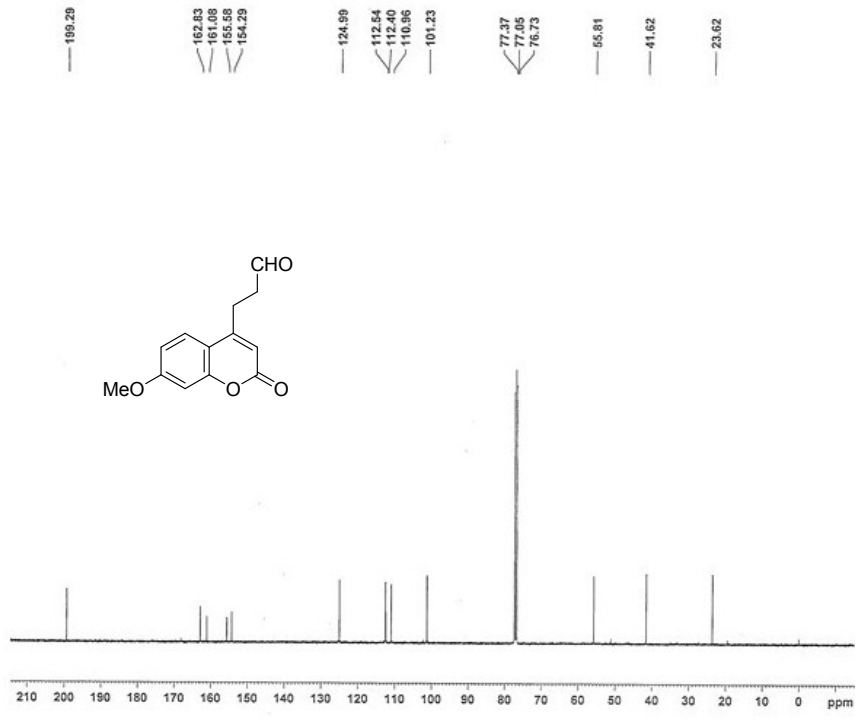

**Fig. S4.** <sup>1</sup>H NMR (CDCl<sub>3</sub>) and <sup>13</sup>C NMR (CDCl<sub>3</sub>) of compound 1d

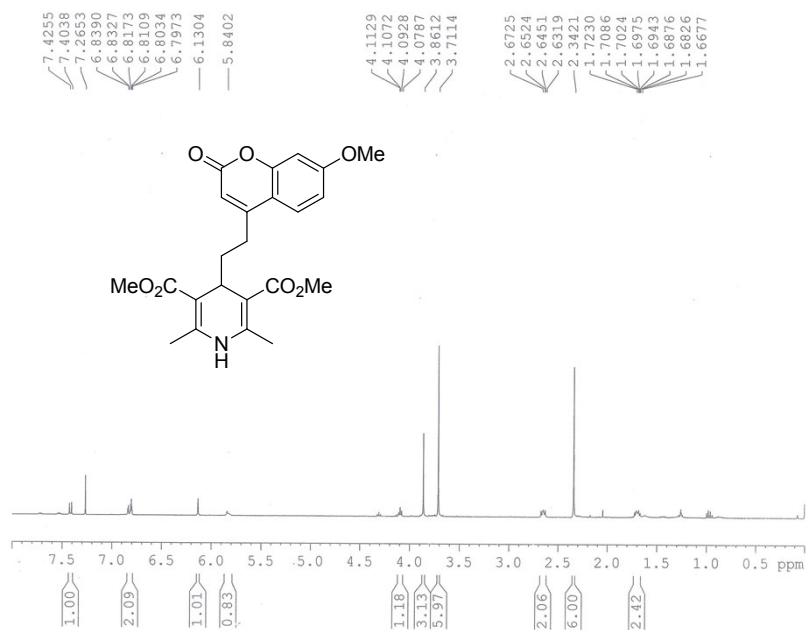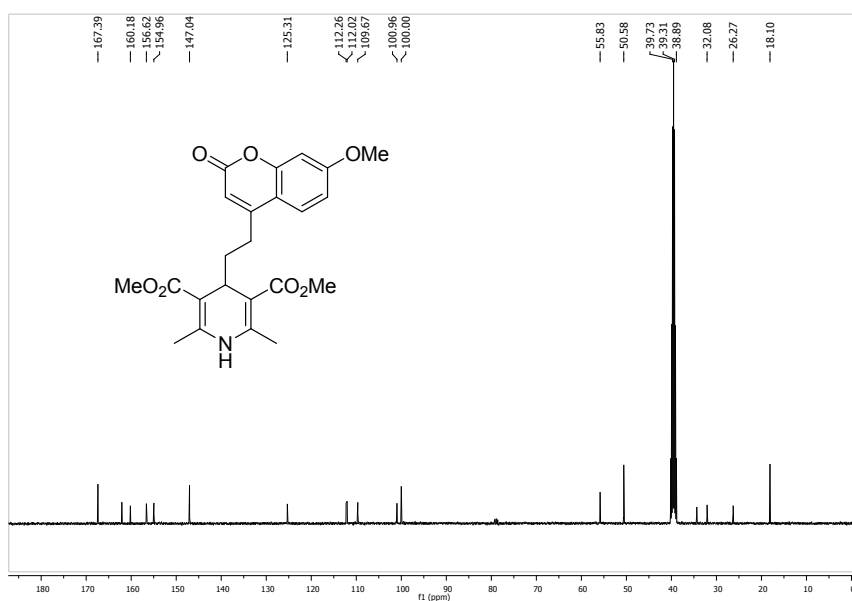

Fig. S5. <sup>1</sup>H NMR (CDCl<sub>3</sub>) and <sup>13</sup>C NMR (DMSO-*d*<sub>6</sub>) of compound **DHP-1**

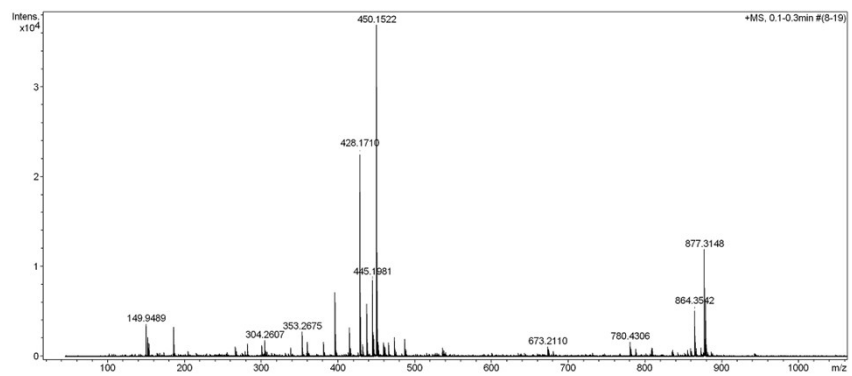

Fig. S6 The HR-MS spectrum for probe **DHP-1**

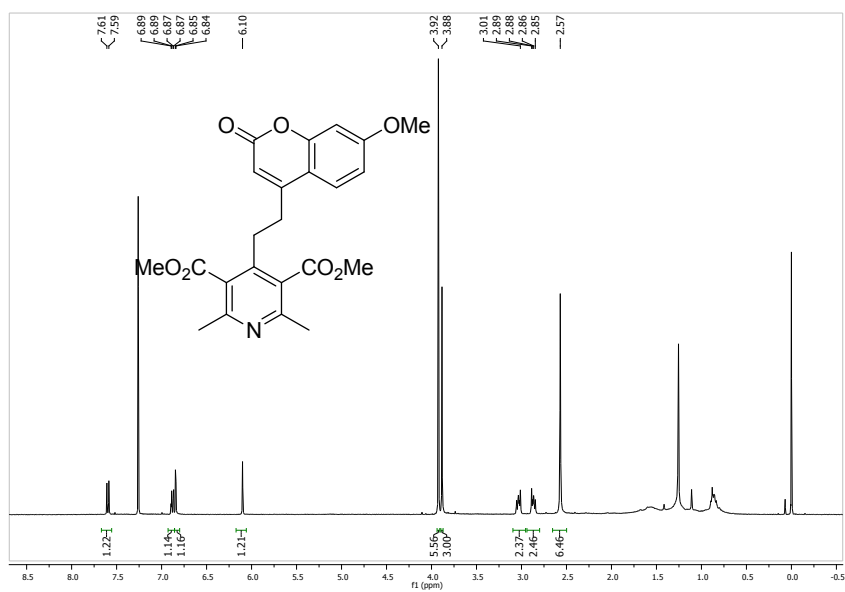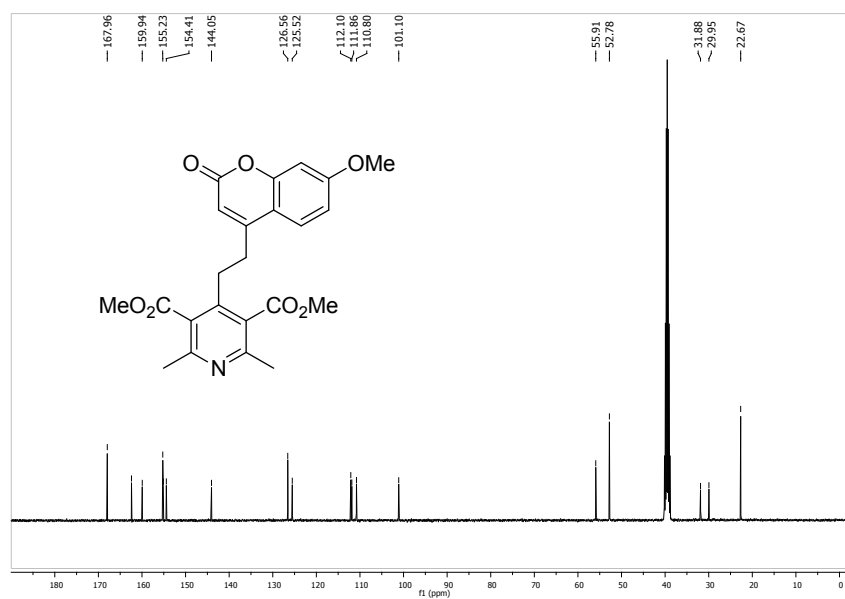

**Fig. S7.** <sup>1</sup>H NMR (CDCl<sub>3</sub>) and <sup>13</sup>C NMR (DMSO-*d*<sub>6</sub>) of compound **PY-1**

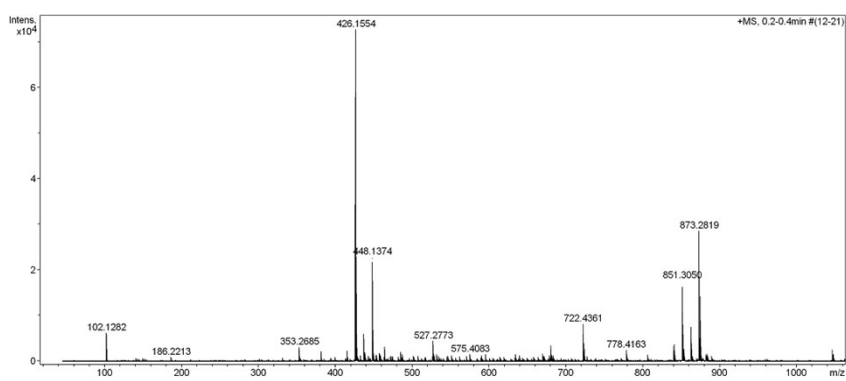

**Fig. S8** The HR-MS spectrum for compound **PY-1**
